# Supplementary material for: Activity disruption causes degeneration of entorhinal neurons in a mouse model of Alzheimer’s circuit dysfunction
Source: eLife. 2022 Dec 5;11:e83813. doi: 10.7554/eLife.83813 (PMC9873254; doi:10.7554/eLife.83813)
Supplement: Figure 1—figure supplement 1—source data 1. [file elife-83813-fig1-figsupp1-data1.xlsx]

## Sheet: Supp Fig 1C
VEH	IVM
1063	929
1316	762
1386	1105
1606	1093
1717	739
1362	629
1605	1314

## Sheet: Supp Fig 1D
VEH	IVM
2458	2596
3007	3329
2411	3043
3056	2594
	2882
	3431
	3009
