# Supplementary material for: Activity disruption causes degeneration of entorhinal neurons in a mouse model of Alzheimer’s circuit dysfunction
Source: eLife. 2022 Dec 5;11:e83813. doi: 10.7554/eLife.83813 (PMC9873254; doi:10.7554/eLife.83813)
Supplement: Figure 1—figure supplement 2—source data 1. [file elife-83813-fig1-figsupp2-data1.xlsx]

## Sheet: Supp Fig 2B
Current		YFP control																Kir
50		0	0.22	0	0	0	0	0	0	0	0	0	0	0	0	0		0	0	0	0	0	0	0	0	0	0
100		0	0.28	0.07	0	0	0	0	0	0	0	0	0.06	0	0	0		0.03	0.04	0.23	0	0	0	0	0	0	0
150		0.06	0.47	0.19	0.11	0.06	0	0	0	0	0.17	0.23	0.4	0	0	0.22		0.07	0.2	0.27	0.11	0	0	0	0.05	0.05	0
200		0.11	0.57	0.25	0.22	0.13	0.08	0.06	0.26	0.13	0.36	0.37	0.75	0.12	0	0.32		0.13	0.2	0.39	0.07	0	0	0.02	0.07	0.06	0.2
250		0.14	0.68	0.3	0.37	0.19	0.11	0.13	0.4	0.55	0.5	0.52	0.93	0.39	0.14	0.59		0.17	0.24	0.35	0.18	0	0	0.04	0.08	0.14	0.22
300		0.24	0.67	0.29	0.47	0.29	0.47	0.28	0.51	0.87	0.64	0.6	1.06	0.57	0.26	0.7		0.27	0.24	0.37	0.25	0.02	0.01	0.06	0.09	0.18	0.3
350		0.24	0.77	0.29	0.66	0.45	0.39	0.33	0.54	1	0.61	0.6	1.05	0.67	0.39	0.83		0.24	0.27	0.38	0.26	0.11	0.06	0.13	0.08	0.2	0.36
400		0.2	0.85	0.28	0.63	0.45	0.51	0.42	0.57	1.2	0.65	0.66	1.07	0.73	0.54	1.02		0.33	0.25	0.34	0.27	0.22	0.14	0.15	0.11	0.25	0.42
450		0.28	0.92	0.28	0.81	0.48	0.54	0.62	0.61	1.3	0.77	0.71	1.1	0.75	0.69	1.02		0.36	0.27	0.32	0.26	0.25	0.21	0.14	0.11	0.26	0.55
500		0.29	0.97	0.29	0.7	0.6	0.69	0.66	0.61	1.31	0.69	0.69	1.1	0.81	0.85	1.02		0.4	0.29	0.31	0.4	0.28	0.23	0.27	0.14	0.3	0.54

## Sheet: Supp Fig 2E
7-10 DPI	28-31 DPI
29.0205	17.6765
28.388	14.5535
20.2815	13.993
20.225	14.154
19.383	17.4875
