# Supplementary material for: Activity disruption causes degeneration of entorhinal neurons in a mouse model of Alzheimer’s circuit dysfunction
Source: eLife. 2022 Dec 5;11:e83813. doi: 10.7554/eLife.83813 (PMC9873254; doi:10.7554/eLife.83813)
Supplement: Figure 1—source data 1. [file elife-83813-fig1-data1.xlsx]

## Sheet: Fig 1A
Nop-GlyCl
Current		aCSF														IVM 100 nM
0		0	0	0	0	0	0	0	0	0	0	0	0	0		0	0	0	0	0	0	0	0	0	0	0	0	0
20		0	0	0	0	0	0	0	0	0	0	0	0	0		0	0	0	0	0	0	0	0	0	0	0	0	0
40		0	1	0	0	0	0	0	4	2	3	1	2	0		0	0	0	0	0	0	0	0	0	0	0	0	0
60		0	2	0	2	1	1	2	7	3	4	3	5	1		0	0	0	0	0	0	0	0	0	0	0	0	0
80		2	3	0	4	3	3	5	10	4	6	4	6	3		0	0	0	0	0	2	0	1	0	0	0	0	0
100		4	3	2	6	5	5	8	12	4	7	5	8	5		0	0	0	0	0	3	0	1	0	0	0	0	0
120		6	4	3	8	6	6	8	13	5	7	6	9	6		0	0	0	0	0	4	0	2	0	0	0	0	0
140		8	4	4	10	8	7	10	14	6	8	6	10	8		0	0	0	0	0	5	2	1	0	0	0	2	1
160		8	5	5	11	9	8	10	16	7	8	7	11	9		0	0	0	0	0	6	6	1	0	0	0	2	3
180		10	5	6	12	10	9	11	16	7	9	7	12	10		0	0	0	0	0	7	9	2	0	2	1	4	5
200		10	5	6	12	11	10	11	17	7	9	7	12	11		4	0	0	0	0	7	9	2	1	2	1	6	6
Control
Current		aCSF														IVM 100 nM
0		0	0	0	0	0	0	0	0	0	0					0	0	0	0	0	0	0	0	0	0
20		0	0	0	0	1	1	0	0	0	0					0	0	0	0	0	0	0	0	0	0
40		2	0	0	3	4	4	0	0	0	1					5	4	0	2	2	1	0	0	0	0
60		4	6	0	5	6	5	1	1	1	3					6	9	0	4	5	3	0	2	2	1
80		6	9	3	6	8	6	3	4	2	4					6	11	0	6	6	4	2	4	3	5
100		7	10	4	8	9	8	5	5	3	5					8	10	2	7	7	5	3	5	4	7
120		8	10	6	9	10	9	6	6	4	7					8	10	2	8	8	7	4	6	5	8
140		9	12	7	10	11	9	7	7	5	8					9	13	4	9	9	7	5	7	6	9
160		10	12	8	11	11	6	8	8	6	8					10	11	5	10	10	8	6	7	7	11
180		10	14	8	12	13	4	9	9	6	9					10	12	6	10	11	8	7	8	8	12
200		11	14	9	12	13	4	10	9	7	9					10	12	7	11	11	8	7	8	8	12

## Sheet: Fig 1B
Veh	0-1	2-3	4-5	6-7	10-13
114	97	80	54	51	43
93	106	107	47	73	68
112	103	97	84	48	61
123		102	95	60
117		120	77	30
			69	69

## Sheet: Fig 1C
Veh	0-1	2-3	4-5	6-7	10-13
0.4	5.2	10.3	1.5	0.3	0.7
0.3	0.3	7.8	0.9	1.9	0.3
0.5	3.5	7	3.1	0.2	0
0.4		6.7	5.1	0.8
0			1.6	0.8
			1.3	0.2

## Sheet: Fig 1D
Veh	0-1	2-3	4-5	6-7	10-13
0	1	34	46	55	5
0	0	0	49	7	4
0	0	2	13	19	4
0		9	28	0
0		1	20	34
			38	11

## Sheet: Fig 1E
Veh	0-1	2-3	4-5	6-7	10-13
0.9965	2.72337	3.27588	14.435	13.3895	2.267
1.61463	2.76875	6.55	10.2658	11.0456	4.527
2.53662	3.87625	7.26112	13.7074	12.3201	5.909
2.09775	2.56162	4.23	11.4787	11.9462
	6.07475	5.73	10.4349	16.7478
	5.2	10.2573	10.1668	23.5251
		11.9829	18.5069	8.95675
		9.93437	11.56
