# Supplementary material for: Activity disruption causes degeneration of entorhinal neurons in a mouse model of Alzheimer’s circuit dysfunction
Source: eLife. 2022 Dec 5;11:e83813. doi: 10.7554/eLife.83813 (PMC9873254; doi:10.7554/eLife.83813)
Supplement: Figure 2—figure supplement 1—source data 1. [file elife-83813-fig2-figsupp1-data1.xlsx]

## Sheet: Supp Fig 3, Nop-Gly
Presubiculum
Current		aCSF										IVM 100 nM
0		0	0	0	0	0	0	0	0	0		0	0	0	0	0	0	0	0	0
20		0	0	4	0	0	0	0	0	0		0	0	1	0	0	0	0	0	0
40		0	0	6	0	0	0	0	0	0		0	0	1	0	0	0	0	0	0
60		2	3	8	0	1	1	0	1	1		0	0	5	0	0	0	0	0	0
80		4	5	10	0	3	2	2	3	3		0	1	4	0	0	0	0	0	0
100		5	6	11	3	5	4	3	4	5		0	3	7	0	0	0	0	0	0
120		7	8	12	4	7	5	6	5	6		0	5	3	0	2	1	0	0	0
140		7	9	13	5	8	6	7	5	8		1	6	3	0	5	2	0	0	1
160		8	10	14	6	10	7	7	6	9		4	7	2	0	9	4	0	0	3
180		9	11	14	7	12	8	8	7	10		5	8	1	0	9	5	0	0	5
200		10	12	14	8	12	8	9	7	11		7	9	1	1	11	6	0	1	6
Parasubiculum
Current		aCSF										IVM 100 nM
0		0	0	0	0	0	0	0	0	0		0	0	0	0	0	0	0	0	0
20		2	0	0	0	0	0	0	0	0		0	0	0	0	0	0	0	0	0
40		4	0	0	0	0	3	0	0	0		0	0	0	0	0	0	0	0	0
60		6	2	1	5	0	4	0	1	1		3	0	0	0	0	0	0	0	0
80		7	3	3	5	0	6	0	2	3		5	0	0	0	0	1	0	0	0
100		9	4	4	8	0	7	2	4	5		7	0	0	1	0	4	0	0	0
120		9	5	5	10	3	7	5	6	6		7	0	0	1	0	5	0	0	0
140		10	5	6	12	5	9	7	7	8		8	0	1	1	0	6	0	0	1
160		10	5	7	13	6	9	8	8	9		7	0	3	1	0	7	3	2	3
180		10	6	8	14	8	10	10	9	10		6	0	5	1	0	8	4	2	5
200		10	6	8	15	10	11	10	10	11		4	0	5	1	0	8	5	3	6

## Sheet: Supp Fig3, Control
Presubiculum
Current		aCSF								IVM 100 nM
0		0	0	0	0	0	0	0		0	0	0	0	0	0	0	0
20		0	0	2	0	0	0	0		0	2	3	0	0	0	0	0
40		0	0	4	0	4	0	0		0	4	5	0	0	1	0	0
60		1	3	6	0	6	3	1		0	6	6	0	0	4	0	0
80		4	4	7	1	8	5	2		2	7	7	1	4	5	0	0
100		7	6	8	4	10	6	4		5	8	8	3	6	7	0	0
120		9	7	9	5	10	7	5		7	9	8	5	7	7	1	0
140		9	7	9	6	12	7	6		8	10	8	6	8	8	2	1
160		11	8	9	7	12	8	7		9	10	8	7	10	9	4	3
180		13	9	9	8	13	8	8		10	10	9	8	10	9	5	5
200		14	9	10	9	14	9	8		11	10	9	9	11	10	6	6
Parasubiculum
Current		aCSF								IVM 100 nM
0		0	0	0	0	0	0			0	0	0	0	0	0
20		0	0	0	0	0	2			0	0	0	0	0	0
40		0	3	0	1	0	4			0	0	0	1	0	3
60		4	4	0	3	0	5			2	0	0	3	0	4
80		7	6	1	4	3	6			9	1	1	4	0	5
100		9	7	4	5	6	7			10	4	3	5	0	6
120		10	7	5	6	7	8			11	5	5	6	0	7
140		11	9	6	6	8	9			12	6	6	6	1	7
160		12	9	7	7	9	9			12	7	7	7	4	7
180		12	10	8	8	10	9			11	8	8	8	6	8
200		14	11	9	8	10	10			11	8	9	8	7	9
