# Supplementary material for: Activity disruption causes degeneration of entorhinal neurons in a mouse model of Alzheimer’s circuit dysfunction
Source: eLife. 2022 Dec 5;11:e83813. doi: 10.7554/eLife.83813 (PMC9873254; doi:10.7554/eLife.83813)
Supplement: Figure 2—source data 1. [file elife-83813-fig2-data1.xlsx]

## Sheet: Fig 2C
Presubiculum
Current		aCSF										IVM 100 nM
0		0	0	0	0	0	0	0	0	0		0	0	0	0	0	0	0	0	0
20		0	0	4	0	0	0	0	0	0		0	0	1	0	0	0	0	0	0
40		0	0	6	0	0	0	0	0	0		0	0	1	0	0	0	0	0	0
60		2	3	8	0	1	1	0	1	1		0	0	5	0	0	0	0	0	0
80		4	5	10	0	3	2	2	3	3		0	1	4	0	0	0	0	0	0
100		5	6	11	3	5	4	3	4	5		0	3	7	0	0	0	0	0	0
120		7	8	12	4	7	5	6	5	6		0	5	3	0	2	1	0	0	0
140		7	9	13	5	8	6	7	5	8		1	6	3	0	5	2	0	0	1
160		8	10	14	6	10	7	7	6	9		4	7	2	0	9	4	0	0	3
180		9	11	14	7	12	8	8	7	10		5	8	1	0	9	5	0	0	5
200		10	12	14	8	12	8	9	7	11		7	9	1	1	11	6	0	1	6
Parasubiculum
Current		aCSF										IVM 100 nM
0		0	0	0	0	0	0	0	0	0		0	0	0	0	0	0	0	0	0
20		2	0	0	0	0	0	0	0	0		0	0	0	0	0	0	0	0	0
40		4	0	0	0	0	3	0	0	0		0	0	0	0	0	0	0	0	0
60		6	2	1	5	0	4	0	1	1		3	0	0	0	0	0	0	0	0
80		7	3	3	5	0	6	0	2	3		5	0	0	0	0	1	0	0	0
100		9	4	4	8	0	7	2	4	5		7	0	0	1	0	4	0	0	0
120		9	5	5	10	3	7	5	6	6		7	0	0	1	0	5	0	0	0
140		10	5	6	12	5	9	7	7	8		8	0	1	1	0	6	0	0	1
160		10	5	7	13	6	9	8	8	9		7	0	3	1	0	7	3	2	3
180		10	6	8	14	8	10	10	9	10		6	0	5	1	0	8	4	2	5
200		10	6	8	15	10	11	10	10	11		4	0	5	1	0	8	5	3	6

## Sheet: Fig 2D
EC
Current		aCSF														IVM 100 nM
0		0	0	0	0	0	0	0	0	0	0	0	0	0		0	0	0	0	0	0	0	0	0	0	0	0	0
20		0	0	0	0	0	0	0	0	0	0	0	0	0		0	0	0	0	0	0	0	0	0	0	0	0	0
40		0	1	0	0	0	0	0	4	2	3	1	2	0		0	0	0	0	0	0	0	0	0	0	0	0	0
60		0	2	0	2	1	1	2	7	3	4	3	5	1		0	0	0	0	0	0	0	0	0	0	0	0	0
80		2	3	0	4	3	3	5	10	4	6	4	6	3		0	0	0	0	0	2	0	1	0	0	0	0	0
100		4	3	2	6	5	5	8	12	4	7	5	8	5		0	0	0	0	0	3	0	1	0	0	0	0	0
120		6	4	3	8	6	6	8	13	5	7	6	9	6		0	0	0	0	0	4	0	2	0	0	0	0	0
140		8	4	4	10	8	7	10	14	6	8	6	10	8		0	0	0	0	0	5	2	1	0	0	0	2	1
160		8	5	5	11	9	8	10	16	7	8	7	11	9		0	0	0	0	0	6	6	1	0	0	0	2	3
180		10	5	6	12	10	9	11	16	7	9	7	12	10		0	0	0	0	0	7	9	2	0	2	1	4	5
200		10	5	6	12	11	10	11	17	7	9	7	12	11		4	0	0	0	0	7	9	2	1	2	1	6	6
Presubiculum
Current		aCSF										IVM 100 nM
0		0	0	0	0	0	0	0	0	0		0	0	0	0	0	0	0	0	0
20		0	0	4	0	0	0	0	0	0		0	0	1	0	0	0	0	0	0
40		0	0	6	0	0	0	0	0	0		0	0	1	0	0	0	0	0	0
60		2	3	8	0	1	1	0	1	1		0	0	5	0	0	0	0	0	0
80		4	5	10	0	3	2	2	3	3		0	1	4	0	0	0	0	0	0
100		5	6	11	3	5	4	3	4	5		0	3	7	0	0	0	0	0	0
120		7	8	12	4	7	5	6	5	6		0	5	3	0	2	1	0	0	0
140		7	9	13	5	8	6	7	5	8		1	6	3	0	5	2	0	0	1
160		8	10	14	6	10	7	7	6	9		4	7	2	0	9	4	0	0	3
180		9	11	14	7	12	8	8	7	10		5	8	1	0	9	5	0	0	5
200		10	12	14	8	12	8	9	7	11		7	9	1	1	11	6	0	1	6
Parasubiculum
Current		aCSF										IVM 100 nM
0		0	0	0	0	0	0	0	0	0		0	0	0	0	0	0	0	0	0
20		2	0	0	0	0	0	0	0	0		0	0	0	0	0	0	0	0	0
40		4	0	0	0	0	3	0	0	0		0	0	0	0	0	0	0	0	0
60		6	2	1	5	0	4	0	1	1		3	0	0	0	0	0	0	0	0
80		7	3	3	5	0	6	0	2	3		5	0	0	0	0	1	0	0	0
100		9	4	4	8	0	7	2	4	5		7	0	0	1	0	4	0	0	0
120		9	5	5	10	3	7	5	6	6		7	0	0	1	0	5	0	0	0
140		10	5	6	12	5	9	7	7	8		8	0	1	1	0	6	0	0	1
160		10	5	7	13	6	9	8	8	9		7	0	3	1	0	7	3	2	3
180		10	6	8	14	8	10	10	9	10		6	0	5	1	0	8	4	2	5
200		10	6	8	15	10	11	10	10	11		4	0	5	1	0	8	5	3	6

## Sheet: Fig 2E
	EC				Para				Pre
	Veh	1X IVM	2X IVM		Veh	1X IVM	2X IVM		Veh	1X IVM	2X IVM
	142.75	68	49.75		247.5	204.25	183.25		147	242.333	259
	161.5	68.75	45.25		292.25	247	203		205.333	234.333	190.333
	158.75	63.75	52		269.25	228	211.75		169.333	266	267.333
	149.25	74.5	49.25		235.5	255.5	217		258.667	118	206.333
	147	82.5	34.75		252.75	194.5	134		234.333	265.333	241.667
		77.25	41		308.75	263.25	185.25		200.667	176.667	196.333
		86.75				256				253

## Sheet: Fig 2I
EC	Para	Pre
92.8327	83.4614	12.9849
94.7984	80.2779	14.576
96.5497	84.709	12.1091
115.48	112.3	16.6675
100.339	89.3501	15.4982
