# Supplementary material for: Activity disruption causes degeneration of entorhinal neurons in a mouse model of Alzheimer’s circuit dysfunction
Source: eLife. 2022 Dec 5;11:e83813. doi: 10.7554/eLife.83813 (PMC9873254; doi:10.7554/eLife.83813)
Supplement: Figure 3—source data 1. [file elife-83813-fig3-data1.xlsx]

## Sheet: Fig 3B, GFP
Veh	IVM
93.33	59.33
94	40.66
98.66	39
111.66	47.33
36.33	53.33
87.33	62
	61

## Sheet: Fig 3B, Reelin
Veh	IVM
202	157
169.33	72
117.33	113.33
165	112
190	139
156	117
	109

## Sheet: Fig 3B, Wfs1
Veh	IVM
95	107.33
92.66	59.66
85	64.66
88.33	74.33
75.66	68.66
92	73.66
	84
