# Supplementary material for: Activity disruption causes degeneration of entorhinal neurons in a mouse model of Alzheimer’s circuit dysfunction
Source: eLife. 2022 Dec 5;11:e83813. doi: 10.7554/eLife.83813 (PMC9873254; doi:10.7554/eLife.83813)
Supplement: Figure 4—source data 1. [file elife-83813-fig4-data1.xlsx]

## Sheet: Fig 4B
Current		YFP control																TeTX
50		0	0.22	0	0	0	0	0	0	0	0	0	0	0	0	0		0	0	0	0	0	0	0	0	0	0	0	0	0	0.02	0	0	0
100		0	0.28	0.07	0	0	0	0	0	0	0	0	0.06	0	0	0		0	0	0	0	0	0	0	0	0	0	0	0	0	0.06	0.06	0	0
150		0.06	0.47	0.19	0.11	0.06	0	0	0	0	0.17	0.23	0.4	0	0	0.22		0	0	0	0	0.1	0	0	0.07	0.07	0	0	0.523077	0	0.17	0.2	0.03	0.07
200		0.11	0.57	0.25	0.22	0.13	0.08	0.06	0.26	0.13	0.36	0.37	0.75	0.12	0	0.32		0	0.08	0.2	0.06	0.14	0.09	0.11	0.1	0.17	0.07	0.12	0.16	0	0.25	0.27	0.06	0.15
250		0.14	0.68	0.3	0.37	0.19	0.11	0.13	0.4	0.55	0.5	0.52	0.93	0.39	0.14	0.59		0.03	0.08	0.24	0.09	0.14	0.09	0.16	0.26	0.31	0.2	0.21	0.24	0.05	0.33	0.38	0.09	0.25
300		0.24	0.67	0.29	0.47	0.29	0.47	0.28	0.51	0.87	0.64	0.6	1.06	0.57	0.26	0.7		0.18	0.15	0.3	0.19	0.18	0.12	0.22	0.38	0.37	0.15	0.24	0.27	0.12	0.33	0.38	0.14	0.35
350		0.24	0.77	0.29	0.66	0.45	0.39	0.33	0.54	1	0.61	0.6	1.05	0.67	0.39	0.83		0.34	0.66	0.35	0.28	0.13	0.16	0.28	0.45	0.58	0.36	0.33	0.35	0.21	0.35	0.44	0.14	0.38
400		0.2	0.85	0.28	0.63	0.45	0.51	0.42	0.57	1.2	0.65	0.66	1.07	0.73	0.54	1.02		0.44	0.86	0.32	0.35	0.21	0.3	0.36	0.74	0.56	0.39	0.32	0.37	0.24	0.33	0.43	0.16	0.4
450		0.28	0.92	0.28	0.81	0.48	0.54	0.62	0.61	1.3	0.77	0.71	1.1	0.75	0.69	1.02		0.56	0.84	0.35	0.39	0.19	0.28	0.51	0.54	0.64	0.37	0.34	0.45	0.28	0.34	0.46	0.2	0.46
500		0.29	0.97	0.29	0.7	0.6	0.69	0.66	0.61	1.31	0.69	0.69	1.1	0.81	0.85	1.02		0.57	0.81	0.33	0.43	0.16	0.34	0.47	0.46	0.7	0.47	0.48	0.42	0.35	0.42	0.47	0.2	0.47
