# Supplementary material for: Activity disruption causes degeneration of entorhinal neurons in a mouse model of Alzheimer’s circuit dysfunction
Source: eLife. 2022 Dec 5;11:e83813. doi: 10.7554/eLife.83813 (PMC9873254; doi:10.7554/eLife.83813)
Supplement: Figure 6—figure supplement 2—source data 1. [file elife-83813-fig6-figsupp2-data1.xlsx]

## Sheet: Supp Fig 4A
Saline+Veh ipsi	Saline+Veh contra	Saline+IVM ipsi	Saline+IVM contra	TTX+Veh ipsi	TTX+Veh contra	TTX+IVM ipsi	TTX+IVM contra
41.3563	27.65	8.60333	16.0267	47.12	44.8367	13.8067	17.9733
44.5133	34.6653	4.27	3.54333	33.0967	31.94	10.1767	10.6133
34.87	34.9733	3.51333	4.73333	37.0733	31.2433	15	17.6233
		11.5967	14.9133	49.7733	40.6567	33.74	27.5867
		8.96333	14.6633	34.7733	42.8633	7.87667	5.71333
		23.6467	15.33	40.3333	40.8667	7.12667	7.64667
						5.37667	7.09
						13.8767	13.8233
						13.8067	9.44667

## Sheet: Supp Fig 4B
Saline+Veh ipsi	Saline+Veh contra	Saline+IVM ipsi	Saline+IVM contra	TTX+Veh Ipsi	TTX+Veh contra	TTX+IVM ipsi	TTX+IVM contra
0	0	4.75	14.2857	0	0	3	16.5714
0	0	12.2857	11.25	0	0	15	16.5
0	0	5.375	11.625	0	0	7.85714	35.5
		1.75	7	0	0	3.875	20
		7.8	6	0	0	5.25	14.25
		0	0.166667			0	0
						10.2857	19
						8.25	27.5
						1.375	8.25

## Sheet: Supp Fig 4C
Saline+Veh ipsi	Saline+Veh contra	Saline+IVM ipsi	Saline+IVM contra	TTX+Veh Ipsi	TTX+Veh contra	TTX+IVM ipsi	TTX+IVM contra
0	0	4.75	14.2857	0	0	3	16.5714
0	0	12.2857	11.25	0	0	15	16.5
0	0	5.375	11.625	0	0	7.85714	35.5
		1.75	7	0	0	3.875	20
		7.8	6	0	0	5.25	14.25
		0	0.166667			0	0
						10.2857	19
						8.25	27.5
						1.375	8.25
