# Supplementary material for: Activity disruption causes degeneration of entorhinal neurons in a mouse model of Alzheimer’s circuit dysfunction
Source: eLife. 2022 Dec 5;11:e83813. doi: 10.7554/eLife.83813 (PMC9873254; doi:10.7554/eLife.83813)
Supplement: Figure 6—source data 1. [file elife-83813-fig6-data1.xlsx]

## Sheet: Fig 6C
Saline ipsi	Saline contra	TTX ipsi	TTX contra
42.7387	45.519	58.368	22.766
38.7117	38.7517	74.0467	44.81
44.1627	42.2893	67.8163	48.485
47.1623	47.3367	59.2853	45.8093
34.8083	36.5957	75.406	57.629
34.255	36.588	76.9433	45.1237
38.7003	40.6467	68.264	45.732
37.228	43.247	72.959	37.685
		71.3793	60.7657
		75.999	65.307
		72.2547
		83.126
		75.7947

## Sheet: Fig 6D
Saline ipsi	Saline contra	TTX ipsi	TTX contra
10875	8190	49241.7	9663.5
15830	16528	42365.7	13097.7
10619.3	7131.67	46244	14433.3
18206	13844.7	24597	18801.7
16794.7	8066.33	75471.3	15734.3
12843	20472.3	33881	12182
11163.5	15663.3	49566.3	12379.3
14309.7	19889	40532.7	24787.3
		47049	40662
		40890	4658.5
		51562.3
		47333.3
		55342.7

## Sheet: Fig 6E
Saline ipsi	Saline contra	TTX ipsi	TTX contra
25.46	25.2767	7.46333	15.4853
24.5667	25.74	7.65333	21.3233
17.92	12.3333	8.90333	21.9533
20.6833	18.85	6.55667	21.7433
15.3067	31.6767	10.31	28.2367
33.2	22.1267	6.74867	36.1
26.9933	24.25	1.82	25.6833
21.0533	27.6967	5.86667	20.5533
21.4367		2.52333	40.6267
		7.06	40.6167
		6.24
		23.7267
		19.42
